# Supplementary material
Source: publisher site journal article supplement (https://www.dovepress.com/article/supplementary_file/606851/606851%20Revised%20Supplementary%20Material.docx)
Supplement: Supplementary file 1 [file 606851%20Revised%20Supplementary%20Material.docx]

Appendix S1

Molecular Docking Methodology

S1.1 Protein structure preparation

The full-length sequence of the human BICC1 protein (UniProt ID: Q9H694), containing three KH domains (KH1, KH2, and KH3), was used in this study. Since the primary binding interface of the ligands is located in the linker region between the KH2 and KH3 domains, the docking analysis focused on this region. As no experimentally determined three-dimensional structure of BICC1 is currently available, the AlphaFold predicted model (model ID: AF‑Q9H694‑F1; confidence pLDDT > 90) was downloaded from UniProt. The protein was preprocessed using AutoDock Tools (ADT): water molecules were removed, hydrogen atoms were added, charges were assigned, non‑polar hydrogens were merged, and the final structure was saved in PDBQT format.

S1.2 Ligand structure preparation

Two‑dimensional structures of 14 natural bioactive small molecules were obtained from the PubChem database, with the following corresponding CIDs: curcumin (969516), saikosaponin B4 (107793), osthole (10228), raddeanin A (174742), catechin (289), cucurbitacin B (5281316), galangin (5281616), emodin (3220), evodiamine (442088), paeoniflorin (442534), epigallocatechin‑3‑gallate (65064), astragaloside IV (13943297), 4‑acetylantroquinonol B (112500518), and salvianolic acid A (5281793). After downloading the SDF files, energy minimization was performed using Open Babel with the MMFF94 force field, and the output was saved in mol2 format. Subsequently, hydrogen atoms were added, Gasteiger charges were calculated, atom types were assigned, non‑polar hydrogens were merged using ADT, and the final structures were saved in PDBQT format.

S1.3 Molecular docking parameters

Semi‑flexible docking was performed using AutoDock Vina (v1.1.2). To unify the search space for all ligands and focus on the KH2-KH3 linker region, the grid box center was set at the geometric center of this region. Since the key binding residues of all ligands in this study are distributed within the KH2-KH3 linker and the adjacent KH3/SAM domain, this grid box setting sufficiently covers all potential binding interfaces. The energy range for output binding modes was set to 4 kcal/mol. Nine binding conformations were generated for each ligand, and the conformation with the lowest binding energy was selected for subsequent analysis.

S1.4 Visualization and hydrogen bond identification

Three-dimensional binding mode diagrams of protein-ligand complexes were generated using PyMOL (v2.5). Hydrogen bonds were identified and annotated using PyMOL’s distance measurement tool with a cutoff of 3.5 Å. In the figures, hydrogen bonds are represented as yellow dashed lines with bond lengths labeled, and key residues are highlighted using the stick model.

Supplementary Table S1 Molecular docking parameters of natural active ingredients and BICC1 protein

| Compounds | ΔG (kcal/mol) | Key combination residues | Hydrogen bond length (Å) |
| --- | --- | --- | --- |
| Curcumin | -5.5 | Gln895, Asp877 | 2.5, 3.3, 2.6 |
| Saikosaponin | -9.2 | Asp909, Thr906, Asn934 | 3.4, 2.7, 2.9 |
| Osthole | -5.8 | Leu878 | 3.4 |
| Raddeanin A | -8.6 | Gln902 | - |
| Catechols | -7.7 | Leu905 | 2.5 |
| Cucurbitacin B | -8.7 | Leu878, Asp900 | 3.1, 2.2 |
| Galangin | -6.5 | Gln902 | 2.3 |
| Emodin | -6.9 | Leu927, Ser931 | 2.6, 2.6 |
| Evodiamine | -8.0 | Asn934 | 3.3 |
| Paeoniflorin | -7.3 | Leu901 | 3.1 |
| Epigallocatechin Gallate | -4.9 | Phe894, Ile889 | 2.7, 2.5 |
| Astragaloside IV | -8.1 | Asp909 | 3.2, 3.5 |
| 4-Acetylantroquinonol B | -7.4 | THR-453, ARG-302 | 2.9, 3.0, 3.0, |
| Salvianolic Acid A | -7.3 | GLU-143, ARG-255, THR-331, LYS-242, TYR-333 | 2.3, 2.9, 3.1,3.3, 2.9, 2.5 |
